# Supplementary material
Source: publisher figshare collection journal article supplement (https://acs.figshare.com/ndownloader/files/4562365)
Supplement: Supplementary file 1 [file 4562365]

CRYST1   53.327   53.327   53.327  90.00  90.00  90.00 P 1           1
ATOM      1  C1  COR A   1      -3.356   6.981  -4.367  1.00  0.00      DND  C
ATOM      2  C2  COR A   1      -2.472   6.686  -5.453  1.00  0.00      DND  C
ATOM      3  C3  COR A   1      -1.144   7.022  -5.354  1.00  0.00      DND  C
ATOM      4  C4  COR A   1      -0.680   7.808  -4.209  1.00  0.00      DND  C
ATOM      5  C5  COR A   1      -1.570   8.182  -3.188  1.00  0.00      DND  C
ATOM      6  C6  COR A   1      -2.915   7.747  -3.240  1.00  0.00      DND  C
ATOM      7  C7  COR A   1       0.789   8.038  -4.047  1.00  0.00      DND  C
ATOM      8  C8  COR A   1       1.319   9.346  -4.582  1.00  0.00      DND  C
ATOM      9  C9  COR A   1       2.641   9.572  -4.528  1.00  0.00      DND  C
ATOM     10  C10 COR A   1       3.162  10.798  -5.022  1.00  0.00      DND  C
ATOM     11  C11 COR A   1       2.337  11.767  -5.614  1.00  0.00      DND  C
ATOM     12  C12 COR A   1       0.934  11.511  -5.689  1.00  0.00      DND  C
ATOM     13  C13 COR A   1       0.468  10.322  -5.117  1.00  0.00      DND  C
ATOM     14  N14 COR A   1       1.107   7.892  -2.617  1.00  0.00      DND  N
ATOM     15  C15 COR A   1       1.719   6.856  -2.086  1.00  0.00      DND  C
ATOM     16  O16 COR A   1       2.322   6.011  -2.740  1.00  0.00      DND  O
ATOM     17  C17 COR A   1       1.801   6.681  -0.528  1.00  0.00      DND  C
ATOM     18  N18 COR A   1       2.125   5.383  -0.082  1.00  0.00      DND  N
ATOM     19  C19 COR A   1       0.554   7.154   0.159  1.00  0.00      DND  C
ATOM     20  C20 COR A   1      -0.556   6.123  -0.143  1.00  0.00      DND  C
ATOM     21  C21 COR A   1      -1.920   6.714   0.275  1.00  0.00      DND  C
ATOM     22  C22 COR A   1      -3.066   5.653   0.071  1.00  0.00      DND  C
ATOM     23  N23 COR A   1      -3.179   5.201  -1.354  1.00  0.00      DND  N
ATOM     24  H1  COR A   1      -4.423   6.551  -4.430  1.00  0.00      DND  H
ATOM     25  H2  COR A   1      -2.895   6.274  -6.350  1.00  0.00      DND  H
ATOM     26  H3  COR A   1      -0.483   6.745  -6.240  1.00  0.00      DND  H
ATOM     27  H4  COR A   1      -1.339   8.707  -2.281  1.00  0.00      DND  H
ATOM     28  H5  COR A   1      -3.653   7.957  -2.427  1.00  0.00      DND  H
ATOM     29  H6  COR A   1       1.369   7.308  -4.608  1.00  0.00      DND  H
ATOM     30  H7  COR A   1       3.308   8.736  -4.141  1.00  0.00      DND  H
ATOM     31  H8  COR A   1       4.219  10.983  -4.906  1.00  0.00      DND  H
ATOM     32  H9  COR A   1       2.736  12.677  -6.097  1.00  0.00      DND  H
ATOM     33  H10 COR A   1       0.277  12.205  -6.220  1.00  0.00      DND  H
ATOM     34  H11 COR A   1      -0.629  10.167  -5.117  1.00  0.00      DND  H
ATOM     35  H12 COR A   1       0.773   8.629  -2.038  1.00  0.00      DND  H
ATOM     36  H13 COR A   1       2.596   7.361  -0.237  1.00  0.00      DND  H
ATOM     37  H14 COR A   1       1.523   4.594  -0.358  1.00  0.00      DND  H
ATOM     38  H15 COR A   1       0.673   7.238   1.233  1.00  0.00      DND  H
ATOM     39  H16 COR A   1       0.409   8.171  -0.252  1.00  0.00      DND  H
ATOM     40  H17 COR A   1      -0.629   5.966  -1.228  1.00  0.00      DND  H
ATOM     41  H18 COR A   1      -0.492   5.116   0.279  1.00  0.00      DND  H
ATOM     42  H19 COR A   1      -1.962   7.217   1.282  1.00  0.00      DND  H
ATOM     43  H20 COR A   1      -2.022   7.547  -0.388  1.00  0.00      DND  H
ATOM     44  H21 COR A   1      -2.823   4.810   0.702  1.00  0.00      DND  H
ATOM     45  H22 COR A   1      -4.086   6.098   0.263  1.00  0.00      DND  H
ATOM     46  H23 COR A   1      -3.634   5.868  -1.962  1.00  0.00      DND  H
ATOM     47  CA  GAA A   2       3.342   3.514   0.877  1.00  0.00      DND  C
ATOM     48  C   GAA A   2       3.243   5.019   0.589  1.00  0.00      DND  C
ATOM     49  CB  GAA A   2       4.377   3.275   2.020  1.00  0.00      DND  C
ATOM     50  CG  GAA A   2       3.777   3.522   3.461  1.00  0.00      DND  C
ATOM     51  CD  GAA A   2       4.496   2.767   4.593  1.00  0.00      DND  C
ATOM     52  CE  GAA A   2       3.650   1.626   5.142  1.00  0.00      DND  C
ATOM     53  NZ  GAA A   2       3.411   0.574   4.108  1.00  0.00      DND  N
ATOM     54  O1  GAA A   2       4.132   5.861   0.952  1.00  0.00      DND  O
ATOM     55  N   GAA A   2       3.758   2.816  -0.371  1.00  0.00      DND  N
ATOM     56  HA  GAA A   2       2.324   3.189   1.107  1.00  0.00      DND  H
ATOM     57  HB2 GAA A   2       4.659   2.268   1.938  1.00  0.00      DND  H
ATOM     58  HB1 GAA A   2       5.328   3.932   2.012  1.00  0.00      DND  H
ATOM     59  HG2 GAA A   2       3.903   4.594   3.513  1.00  0.00      DND  H
ATOM     60  HG1 GAA A   2       2.704   3.291   3.474  1.00  0.00      DND  H
ATOM     61  HD2 GAA A   2       5.466   2.339   4.253  1.00  0.00      DND  H
ATOM     62  HD1 GAA A   2       4.802   3.508   5.351  1.00  0.00      DND  H
ATOM     63  HE2 GAA A   2       4.244   1.259   5.969  1.00  0.00      DND  H
ATOM     64  HE1 GAA A   2       2.701   1.929   5.551  1.00  0.00      DND  H
ATOM     65  HZ2 GAA A   2       3.099   0.961   3.206  1.00  0.00      DND  H
ATOM     66  HN1 GAA A   2       4.168   3.413  -1.123  1.00  0.00      DND  H
ATOM     67  CA  GAA A   3      -3.033   3.723  -3.368  1.00  0.00      DND  C
ATOM     68  C   GAA A   3      -2.839   3.996  -1.843  1.00  0.00      DND  C
ATOM     69  CB  GAA A   3      -4.563   3.798  -3.699  1.00  0.00      DND  C
ATOM     70  CG  GAA A   3      -5.516   3.222  -2.610  1.00  0.00      DND  C
ATOM     71  CD  GAA A   3      -6.919   2.997  -3.181  1.00  0.00      DND  C
ATOM     72  CE  GAA A   3      -7.954   2.458  -2.091  1.00  0.00      DND  C
ATOM     73  NZ  GAA A   3      -8.371   3.554  -1.152  1.00  0.00      DND  N
ATOM     74  O1  GAA A   3      -2.343   3.204  -1.027  1.00  0.00      DND  O
ATOM     75  N   GAA A   3      -2.634   2.410  -3.737  1.00  0.00      DND  N
ATOM     76  HA  GAA A   3      -2.365   4.396  -3.817  1.00  0.00      DND  H
ATOM     77  HB2 GAA A   3      -4.791   4.827  -3.859  1.00  0.00      DND  H
ATOM     78  HB1 GAA A   3      -4.739   3.393  -4.652  1.00  0.00      DND  H
ATOM     79  HG2 GAA A   3      -5.159   2.252  -2.341  1.00  0.00      DND  H
ATOM     80  HG1 GAA A   3      -5.514   3.825  -1.667  1.00  0.00      DND  H
ATOM     81  HD2 GAA A   3      -7.276   3.920  -3.620  1.00  0.00      DND  H
ATOM     82  HD1 GAA A   3      -6.800   2.266  -3.937  1.00  0.00      DND  H
ATOM     83  HE2 GAA A   3      -8.788   1.924  -2.596  1.00  0.00      DND  H
ATOM     84  HE1 GAA A   3      -7.313   1.763  -1.561  1.00  0.00      DND  H
ATOM     85  HZ2 GAA A   3      -9.116   4.172  -1.522  1.00  0.00      DND  H
ATOM     86  HN1 GAA A   3      -3.312   1.676  -3.563  1.00  0.00      DND  H
ATOM     87  CA  GAB A   4       3.295  -1.492   2.810  1.00  0.00      DND  C
ATOM     88  C   GAB A   4       3.603  -0.742   4.074  1.00  0.00      DND  C
ATOM     89  CB  GAB A   4       4.535  -1.665   1.927  1.00  0.00      DND  C
ATOM     90  CG  GAB A   4       4.469  -2.771   0.904  1.00  0.00      DND  C
ATOM     91  CD  GAB A   4       5.721  -2.871  -0.018  1.00  0.00      DND  C
ATOM     92  CE  GAB A   4       5.650  -4.114  -0.922  1.00  0.00      DND  C
ATOM     93  NZ  GAB A   4       5.189  -5.384  -0.265  1.00  0.00      DND  N
ATOM     94  O1  GAB A   4       4.076  -1.326   4.992  1.00  0.00      DND  O
ATOM     95  N   GAB A   4       2.157  -0.970   2.051  1.00  0.00      DND  N
ATOM     96  HA  GAB A   4       3.020  -2.458   3.224  1.00  0.00      DND  H
ATOM     97  HB2 GAB A   4       4.835  -0.708   1.475  1.00  0.00      DND  H
ATOM     98  HB1 GAB A   4       5.343  -1.990   2.568  1.00  0.00      DND  H
ATOM     99  HG2 GAB A   4       4.238  -3.661   1.564  1.00  0.00      DND  H
ATOM    100  HG1 GAB A   4       3.591  -2.554   0.407  1.00  0.00      DND  H
ATOM    101  HD2 GAB A   4       6.149  -1.947  -0.567  1.00  0.00      DND  H
ATOM    102  HD1 GAB A   4       6.592  -3.026   0.605  1.00  0.00      DND  H
ATOM    103  HE2 GAB A   4       5.041  -3.894  -1.824  1.00  0.00      DND  H
ATOM    104  HE1 GAB A   4       6.622  -4.356  -1.301  1.00  0.00      DND  H
ATOM    105  HZ2 GAB A   4       4.123  -5.536  -0.314  1.00  0.00      DND  H
ATOM    106  HN1 GAB A   4       2.561  -0.383   1.323  1.00  0.00      DND  H
ATOM    107  CA  GAB A   5       3.606   1.123  -2.197  1.00  0.00      DND  C
ATOM    108  C   GAB A   5       3.415   1.596  -0.687  1.00  0.00      DND  C
ATOM    109  CB  GAB A   5       3.589  -0.439  -2.310  1.00  0.00      DND  C
ATOM    110  CG  GAB A   5       2.283  -1.156  -2.387  1.00  0.00      DND  C
ATOM    111  CD  GAB A   5       2.434  -2.566  -2.808  1.00  0.00      DND  C
ATOM    112  CE  GAB A   5       1.039  -3.289  -3.063  1.00  0.00      DND  C
ATOM    113  NZ  GAB A   5       1.327  -4.676  -3.551  1.00  0.00      DND  N
ATOM    114  O1  GAB A   5       2.950   0.820   0.138  1.00  0.00      DND  O
ATOM    115  N   GAB A   5       4.919   1.519  -2.542  1.00  0.00      DND  N
ATOM    116  HA  GAB A   5       2.879   1.524  -2.834  1.00  0.00      DND  H
ATOM    117  HB2 GAB A   5       4.086  -0.630  -3.267  1.00  0.00      DND  H
ATOM    118  HB1 GAB A   5       4.159  -0.889  -1.459  1.00  0.00      DND  H
ATOM    119  HG2 GAB A   5       1.756  -1.225  -1.473  1.00  0.00      DND  H
ATOM    120  HG1 GAB A   5       1.716  -0.592  -3.111  1.00  0.00      DND  H
ATOM    121  HD2 GAB A   5       3.085  -2.679  -3.656  1.00  0.00      DND  H
ATOM    122  HD1 GAB A   5       2.861  -3.073  -1.942  1.00  0.00      DND  H
ATOM    123  HE2 GAB A   5       0.522  -3.483  -2.091  1.00  0.00      DND  H
ATOM    124  HE1 GAB A   5       0.308  -2.716  -3.602  1.00  0.00      DND  H
ATOM    125  HZ2 GAB A   5       1.483  -5.427  -2.816  1.00  0.00      DND  H
ATOM    126  HN1 GAB A   5       5.703   1.519  -1.890  1.00  0.00      DND  H
ATOM    127  CA  GAB A   6      -8.477   5.129   0.546  1.00  0.00      DND  C
ATOM    128  C   GAB A   6      -7.818   3.887   0.005  1.00  0.00      DND  C
ATOM    129  CB  GAB A   6      -9.981   5.214   0.438  1.00  0.00      DND  C
ATOM    130  CG  GAB A   6     -10.768   3.929   1.024  1.00  0.00      DND  C
ATOM    131  CD  GAB A   6     -12.291   4.065   1.301  1.00  0.00      DND  C
ATOM    132  CE  GAB A   6     -12.881   2.690   1.602  1.00  0.00      DND  C
ATOM    133  NZ  GAB A   6     -13.234   1.959   0.402  1.00  0.00      DND  N
ATOM    134  O1  GAB A   6      -6.834   3.277   0.516  1.00  0.00      DND  O
ATOM    135  N   GAB A   6      -8.081   5.197   1.948  1.00  0.00      DND  N
ATOM    136  HA  GAB A   6      -8.028   5.944   0.048  1.00  0.00      DND  H
ATOM    137  HB2 GAB A   6     -10.366   6.087   1.055  1.00  0.00      DND  H
ATOM    138  HB1 GAB A   6     -10.331   5.395  -0.566  1.00  0.00      DND  H
ATOM    139  HG2 GAB A   6     -10.665   3.097   0.334  1.00  0.00      DND  H
ATOM    140  HG1 GAB A   6     -10.275   3.618   1.893  1.00  0.00      DND  H
ATOM    141  HD2 GAB A   6     -12.551   4.867   2.045  1.00  0.00      DND  H
ATOM    142  HD1 GAB A   6     -12.760   4.400   0.429  1.00  0.00      DND  H
ATOM    143  HE2 GAB A   6     -12.136   2.205   2.265  1.00  0.00      DND  H
ATOM    144  HE1 GAB A   6     -13.755   2.701   2.234  1.00  0.00      DND  H
ATOM    145  HZ2 GAB A   6     -13.834   2.492  -0.191  1.00  0.00      DND  H
ATOM    146  HN1 GAB A   6      -8.111   4.353   2.497  1.00  0.00      DND  H
ATOM    147  CA  GAB A   7      -1.102   0.483  -4.471  1.00  0.00      DND  C
ATOM    148  C   GAB A   7      -1.378   1.994  -4.095  1.00  0.00      DND  C
ATOM    149  CB  GAB A   7      -1.147   0.199  -5.919  1.00  0.00      DND  C
ATOM    150  CG  GAB A   7       0.162   0.507  -6.628  1.00  0.00      DND  C
ATOM    151  CD  GAB A   7       1.134  -0.724  -6.594  1.00  0.00      DND  C
ATOM    152  CE  GAB A   7       2.560  -0.353  -6.608  1.00  0.00      DND  C
ATOM    153  NZ  GAB A   7       3.386  -1.530  -6.814  1.00  0.00      DND  N
ATOM    154  O1  GAB A   7      -0.441   2.800  -4.194  1.00  0.00      DND  O
ATOM    155  N   GAB A   7      -2.105  -0.358  -3.738  1.00  0.00      DND  N
ATOM    156  HA  GAB A   7      -0.101   0.094  -4.162  1.00  0.00      DND  H
ATOM    157  HB2 GAB A   7      -1.369  -0.803  -6.086  1.00  0.00      DND  H
ATOM    158  HB1 GAB A   7      -1.982   0.683  -6.515  1.00  0.00      DND  H
ATOM    159  HG2 GAB A   7       0.067   0.922  -7.636  1.00  0.00      DND  H
ATOM    160  HG1 GAB A   7       0.637   1.377  -6.057  1.00  0.00      DND  H
ATOM    161  HD2 GAB A   7       0.988  -1.388  -5.701  1.00  0.00      DND  H
ATOM    162  HD1 GAB A   7       0.878  -1.348  -7.437  1.00  0.00      DND  H
ATOM    163  HE2 GAB A   7       2.681   0.236  -7.541  1.00  0.00      DND  H
ATOM    164  HE1 GAB A   7       2.783   0.162  -5.685  1.00  0.00      DND  H
ATOM    165  HZ2 GAB A   7       2.991  -2.298  -7.289  1.00  0.00      DND  H
ATOM    166  HN1 GAB A   7      -2.817  -0.856  -4.323  1.00  0.00      DND  H
ATOM    167  CA  GAC A   8       5.467  -7.446   0.986  1.00  0.00      DND  C
ATOM    168  C   GAC A   8       6.030  -6.230   0.338  1.00  0.00      DND  C
ATOM    169  CB  GAC A   8       4.632  -7.048   2.287  1.00  0.00      DND  C
ATOM    170  CG  GAC A   8       3.724  -8.199   2.759  1.00  0.00      DND  C
ATOM    171  CD  GAC A   8       2.470  -7.851   3.632  1.00  0.00      DND  C
ATOM    172  CE  GAC A   8       1.380  -7.111   2.758  1.00  0.00      DND  C
ATOM    173  NZ  GAC A   8       0.300  -6.651   3.591  1.00  0.00      DND  N
ATOM    174  O1  GAC A   8       7.260  -6.118   0.271  1.00  0.00      DND  O
ATOM    175  N   GAC A   8       6.513  -8.367   1.407  1.00  0.00      DND  N
ATOM    176  HA  GAC A   8       4.836  -7.842   0.168  1.00  0.00      DND  H
ATOM    177  HB2 GAC A   8       5.239  -6.746   3.184  1.00  0.00      DND  H
ATOM    178  HB1 GAC A   8       4.035  -6.174   1.992  1.00  0.00      DND  H
ATOM    179  HG2 GAC A   8       3.238  -8.495   1.805  1.00  0.00      DND  H
ATOM    180  HG1 GAC A   8       4.198  -9.063   3.171  1.00  0.00      DND  H
ATOM    181  HD2 GAC A   8       1.887  -8.793   3.805  1.00  0.00      DND  H
ATOM    182  HD1 GAC A   8       2.686  -7.422   4.554  1.00  0.00      DND  H
ATOM    183  HE2 GAC A   8       1.860  -6.302   2.423  1.00  0.00      DND  H
ATOM    184  HE1 GAC A   8       0.904  -7.640   1.901  1.00  0.00      DND  H
ATOM    185  HZ2 GAC A   8       0.611  -6.052   4.411  1.00  0.00      DND  H
ATOM    186  HN1 GAC A   8       6.902  -8.301   2.341  1.00  0.00      DND  H
ATOM    187  CA  GAC A   9      -0.292  -0.415   1.624  1.00  0.00      DND  C
ATOM    188  C   GAC A   9       0.823  -1.116   2.396  1.00  0.00      DND  C
ATOM    189  CB  GAC A   9      -0.268   1.168   1.646  1.00  0.00      DND  C
ATOM    190  CG  GAC A   9      -0.246   1.838   3.032  1.00  0.00      DND  C
ATOM    191  CD  GAC A   9      -0.686   3.348   2.912  1.00  0.00      DND  C
ATOM    192  CE  GAC A   9      -0.660   4.113   4.261  1.00  0.00      DND  C
ATOM    193  NZ  GAC A   9      -1.730   3.522   5.112  1.00  0.00      DND  N
ATOM    194  O1  GAC A   9       0.540  -1.788   3.364  1.00  0.00      DND  O
ATOM    195  N   GAC A   9      -1.596  -0.820   2.007  1.00  0.00      DND  N
ATOM    196  HA  GAC A   9      -0.188  -0.664   0.577  1.00  0.00      DND  H
ATOM    197  HB2 GAC A   9       0.648   1.542   1.243  1.00  0.00      DND  H
ATOM    198  HB1 GAC A   9      -1.077   1.620   1.080  1.00  0.00      DND  H
ATOM    199  HG2 GAC A   9      -0.893   1.346   3.650  1.00  0.00      DND  H
ATOM    200  HG1 GAC A   9       0.766   1.663   3.593  1.00  0.00      DND  H
ATOM    201  HD2 GAC A   9       0.081   3.889   2.297  1.00  0.00      DND  H
ATOM    202  HD1 GAC A   9      -1.628   3.413   2.448  1.00  0.00      DND  H
ATOM    203  HE2 GAC A   9       0.261   4.097   4.878  1.00  0.00      DND  H
ATOM    204  HE1 GAC A   9      -0.974   5.145   4.013  1.00  0.00      DND  H
ATOM    205  HZ2 GAC A   9      -2.424   2.998   4.630  1.00  0.00      DND  H
ATOM    206  HN1 GAC A   9      -2.046  -0.063   2.510  1.00  0.00      DND  H
ATOM    207  CA  GAC A  10       1.633  -6.611  -5.082  1.00  0.00      DND  C
ATOM    208  C   GAC A  10       1.555  -5.046  -4.801  1.00  0.00      DND  C
ATOM    209  CB  GAC A  10       2.869  -7.291  -4.485  1.00  0.00      DND  C
ATOM    210  CG  GAC A  10       4.255  -6.674  -4.791  1.00  0.00      DND  C
ATOM    211  CD  GAC A  10       5.383  -7.125  -3.777  1.00  0.00      DND  C
ATOM    212  CE  GAC A  10       6.737  -6.551  -4.125  1.00  0.00      DND  C
ATOM    213  NZ  GAC A  10       7.703  -6.644  -3.000  1.00  0.00      DND  N
ATOM    214  O1  GAC A  10       1.793  -4.245  -5.633  1.00  0.00      DND  O
ATOM    215  N   GAC A  10       1.586  -6.726  -6.488  1.00  0.00      DND  N
ATOM    216  HA  GAC A  10       0.747  -7.024  -4.652  1.00  0.00      DND  H
ATOM    217  HB2 GAC A  10       2.668  -7.608  -3.514  1.00  0.00      DND  H
ATOM    218  HB1 GAC A  10       2.981  -8.330  -4.826  1.00  0.00      DND  H
ATOM    219  HG2 GAC A  10       4.622  -6.953  -5.719  1.00  0.00      DND  H
ATOM    220  HG1 GAC A  10       4.208  -5.575  -4.808  1.00  0.00      DND  H
ATOM    221  HD2 GAC A  10       5.066  -6.808  -2.788  1.00  0.00      DND  H
ATOM    222  HD1 GAC A  10       5.523  -8.159  -3.903  1.00  0.00      DND  H
ATOM    223  HE2 GAC A  10       7.099  -7.114  -4.960  1.00  0.00      DND  H
ATOM    224  HE1 GAC A  10       6.589  -5.452  -4.332  1.00  0.00      DND  H
ATOM    225  HZ2 GAC A  10       7.344  -6.440  -2.088  1.00  0.00      DND  H
ATOM    226  HN1 GAC A  10       2.472  -6.605  -6.915  1.00  0.00      DND  H
ATOM    227  CA  GAC A  11       6.659   2.768  -3.850  1.00  0.00      DND  C
ATOM    228  C   GAC A  11       5.246   2.128  -3.662  1.00  0.00      DND  C
ATOM    229  CB  GAC A  11       7.602   1.804  -4.498  1.00  0.00      DND  C
ATOM    230  CG  GAC A  11       7.787   0.466  -3.674  1.00  0.00      DND  C
ATOM    231  CD  GAC A  11       8.973  -0.378  -4.196  1.00  0.00      DND  C
ATOM    232  CE  GAC A  11       9.426  -1.602  -3.387  1.00  0.00      DND  C
ATOM    233  NZ  GAC A  11      10.078  -1.279  -2.083  1.00  0.00      DND  N
ATOM    234  O1  GAC A  11       4.425   2.278  -4.572  1.00  0.00      DND  O
ATOM    235  N   GAC A  11       7.186   3.222  -2.574  1.00  0.00      DND  N
ATOM    236  HA  GAC A  11       6.449   3.552  -4.571  1.00  0.00      DND  H
ATOM    237  HB2 GAC A  11       7.285   1.604  -5.498  1.00  0.00      DND  H
ATOM    238  HB1 GAC A  11       8.553   2.228  -4.556  1.00  0.00      DND  H
ATOM    239  HG2 GAC A  11       8.037   0.549  -2.643  1.00  0.00      DND  H
ATOM    240  HG1 GAC A  11       6.882  -0.195  -3.714  1.00  0.00      DND  H
ATOM    241  HD2 GAC A  11       8.836  -0.697  -5.203  1.00  0.00      DND  H
ATOM    242  HD1 GAC A  11       9.943   0.258  -4.117  1.00  0.00      DND  H
ATOM    243  HE2 GAC A  11       8.571  -2.220  -3.214  1.00  0.00      DND  H
ATOM    244  HE1 GAC A  11      10.147  -2.225  -3.958  1.00  0.00      DND  H
ATOM    245  HZ2 GAC A  11      10.632  -0.410  -2.188  1.00  0.00      DND  H
ATOM    246  HN1 GAC A  11       8.057   2.810  -2.352  1.00  0.00      DND  H
ATOM    247  CA  GAC A  12     -13.618   0.147  -1.267  1.00  0.00      DND  C
ATOM    248  C   GAC A  12     -13.050   0.703   0.109  1.00  0.00      DND  C
ATOM    249  CB  GAC A  12     -14.855  -0.752  -1.086  1.00  0.00      DND  C
ATOM    250  CG  GAC A  12     -15.730  -1.009  -2.421  1.00  0.00      DND  C
ATOM    251  CD  GAC A  12     -16.844  -2.013  -2.174  1.00  0.00      DND  C
ATOM    252  CE  GAC A  12     -17.482  -2.564  -3.452  1.00  0.00      DND  C
ATOM    253  NZ  GAC A  12     -16.430  -3.067  -4.418  1.00  0.00      DND  N
ATOM    254  O1  GAC A  12     -12.430  -0.061   0.898  1.00  0.00      DND  O
ATOM    255  N   GAC A  12     -12.511  -0.563  -1.961  1.00  0.00      DND  N
ATOM    256  HA  GAC A  12     -13.984   0.998  -1.890  1.00  0.00      DND  H
ATOM    257  HB2 GAC A  12     -14.480  -1.724  -0.763  1.00  0.00      DND  H
ATOM    258  HB1 GAC A  12     -15.445  -0.443  -0.203  1.00  0.00      DND  H
ATOM    259  HG2 GAC A  12     -16.231  -0.155  -2.792  1.00  0.00      DND  H
ATOM    260  HG1 GAC A  12     -15.018  -1.282  -3.159  1.00  0.00      DND  H
ATOM    261  HD2 GAC A  12     -16.418  -2.765  -1.565  1.00  0.00      DND  H
ATOM    262  HD1 GAC A  12     -17.659  -1.569  -1.552  1.00  0.00      DND  H
ATOM    263  HE2 GAC A  12     -18.174  -3.367  -3.286  1.00  0.00      DND  H
ATOM    264  HE1 GAC A  12     -18.098  -1.799  -3.854  1.00  0.00      DND  H
ATOM    265  HZ2 GAC A  12     -15.995  -2.374  -5.004  1.00  0.00      DND  H
ATOM    266  HN1 GAC A  12     -12.416  -1.525  -1.686  1.00  0.00      DND  H
ATOM    267  CA  GAC A  13      -7.452   6.173   4.066  1.00  0.00      DND  C
ATOM    268  C   GAC A  13      -7.811   6.369   2.609  1.00  0.00      DND  C
ATOM    269  CB  GAC A  13      -5.984   5.975   4.324  1.00  0.00      DND  C
ATOM    270  CG  GAC A  13      -5.095   7.240   4.197  1.00  0.00      DND  C
ATOM    271  CD  GAC A  13      -3.630   6.953   4.603  1.00  0.00      DND  C
ATOM    272  CE  GAC A  13      -2.700   8.090   5.050  1.00  0.00      DND  C
ATOM    273  NZ  GAC A  13      -2.405   9.126   4.019  1.00  0.00      DND  N
ATOM    274  O1  GAC A  13      -7.924   7.510   2.186  1.00  0.00      DND  O
ATOM    275  N   GAC A  13      -8.244   5.201   4.778  1.00  0.00      DND  N
ATOM    276  HA  GAC A  13      -7.698   7.144   4.582  1.00  0.00      DND  H
ATOM    277  HB2 GAC A  13      -5.814   5.519   5.320  1.00  0.00      DND  H
ATOM    278  HB1 GAC A  13      -5.688   5.255   3.614  1.00  0.00      DND  H
ATOM    279  HG2 GAC A  13      -5.191   7.864   3.324  1.00  0.00      DND  H
ATOM    280  HG1 GAC A  13      -5.357   8.025   4.939  1.00  0.00      DND  H
ATOM    281  HD2 GAC A  13      -3.740   6.169   5.448  1.00  0.00      DND  H
ATOM    282  HD1 GAC A  13      -3.115   6.421   3.786  1.00  0.00      DND  H
ATOM    283  HE2 GAC A  13      -3.127   8.680   5.902  1.00  0.00      DND  H
ATOM    284  HE1 GAC A  13      -1.760   7.743   5.395  1.00  0.00      DND  H
ATOM    285  HZ2 GAC A  13      -3.197   9.628   3.643  1.00  0.00      DND  H
ATOM    286  HN1 GAC A  13      -7.802   4.490   5.461  1.00  0.00      DND  H
ATOM    287  CA  GAC A  14       5.231  -3.130  -6.683  1.00  0.00      DND  C
ATOM    288  C   GAC A  14       4.536  -1.862  -6.210  1.00  0.00      DND  C
ATOM    289  CB  GAC A  14       6.769  -3.027  -6.647  1.00  0.00      DND  C
ATOM    290  CG  GAC A  14       7.503  -4.296  -7.012  1.00  0.00      DND  C
ATOM    291  CD  GAC A  14       8.835  -4.401  -6.248  1.00  0.00      DND  C
ATOM    292  CE  GAC A  14       9.764  -5.484  -6.854  1.00  0.00      DND  C
ATOM    293  NZ  GAC A  14      10.700  -6.000  -5.875  1.00  0.00      DND  N
ATOM    294  O1  GAC A  14       5.137  -1.189  -5.291  1.00  0.00      DND  O
ATOM    295  N   GAC A  14       4.864  -3.338  -8.129  1.00  0.00      DND  N
ATOM    296  HA  GAC A  14       4.949  -3.961  -5.989  1.00  0.00      DND  H
ATOM    297  HB2 GAC A  14       7.158  -2.304  -7.414  1.00  0.00      DND  H
ATOM    298  HB1 GAC A  14       7.070  -2.700  -5.619  1.00  0.00      DND  H
ATOM    299  HG2 GAC A  14       6.838  -5.107  -6.788  1.00  0.00      DND  H
ATOM    300  HG1 GAC A  14       7.711  -4.204  -8.054  1.00  0.00      DND  H
ATOM    301  HD2 GAC A  14       9.319  -3.451  -5.960  1.00  0.00      DND  H
ATOM    302  HD1 GAC A  14       8.605  -4.709  -5.245  1.00  0.00      DND  H
ATOM    303  HE2 GAC A  14       9.181  -6.343  -7.054  1.00  0.00      DND  H
ATOM    304  HE1 GAC A  14      10.185  -4.921  -7.684  1.00  0.00      DND  H
ATOM    305  HZ2 GAC A  14      10.465  -6.793  -5.320  1.00  0.00      DND  H
ATOM    306  HN1 GAC A  14       4.750  -2.598  -8.750  1.00  0.00      DND  H
ATOM    307  CA  GAC A  15      -2.978  -1.758  -2.017  1.00  0.00      DND  C
ATOM    308  C   GAC A  15      -2.007  -0.727  -2.429  1.00  0.00      DND  C
ATOM    309  CB  GAC A  15      -2.304  -3.135  -2.094  1.00  0.00      DND  C
ATOM    310  CG  GAC A  15      -3.133  -4.270  -1.547  1.00  0.00      DND  C
ATOM    311  CD  GAC A  15      -2.655  -5.750  -1.653  1.00  0.00      DND  C
ATOM    312  CE  GAC A  15      -1.715  -6.225  -0.536  1.00  0.00      DND  C
ATOM    313  NZ  GAC A  15      -1.262  -7.598  -0.789  1.00  0.00      DND  N
ATOM    314  O1  GAC A  15      -1.214  -0.214  -1.614  1.00  0.00      DND  O
ATOM    315  N   GAC A  15      -4.305  -1.754  -2.605  1.00  0.00      DND  N
ATOM    316  HA  GAC A  15      -3.183  -1.580  -0.917  1.00  0.00      DND  H
ATOM    317  HB2 GAC A  15      -1.937  -3.361  -3.074  1.00  0.00      DND  H
ATOM    318  HB1 GAC A  15      -1.435  -3.068  -1.466  1.00  0.00      DND  H
ATOM    319  HG2 GAC A  15      -3.300  -4.031  -0.436  1.00  0.00      DND  H
ATOM    320  HG1 GAC A  15      -4.101  -4.191  -2.070  1.00  0.00      DND  H
ATOM    321  HD2 GAC A  15      -3.498  -6.384  -1.566  1.00  0.00      DND  H
ATOM    322  HD1 GAC A  15      -2.151  -6.064  -2.656  1.00  0.00      DND  H
ATOM    323  HE2 GAC A  15      -1.009  -5.400  -0.541  1.00  0.00      DND  H
ATOM    324  HE1 GAC A  15      -2.273  -6.237   0.416  1.00  0.00      DND  H
ATOM    325  HZ2 GAC A  15      -1.870  -8.363  -0.439  1.00  0.00      DND  H
ATOM    326  HN1 GAC A  15      -4.351  -2.394  -3.407  1.00  0.00      DND  H
ATOM    327  C1  GAD A  16      -6.516  -6.556   5.897  1.00  0.00      DND  C
ATOM    328  C2  GAD A  16      -5.390  -7.077   5.236  1.00  0.00      DND  C
ATOM    329  C3  GAD A  16      -4.169  -6.321   5.068  1.00  0.00      DND  C
ATOM    330  C4  GAD A  16      -4.075  -5.096   5.813  1.00  0.00      DND  C
ATOM    331  C5  GAD A  16      -5.185  -4.576   6.483  1.00  0.00      DND  C
ATOM    332  C6  GAD A  16      -6.412  -5.325   6.527  1.00  0.00      DND  C
ATOM    333  C7  GAD A  16      -7.735  -7.282   5.986  1.00  0.00      DND  C
ATOM    334  C8  GAD A  16      -7.756  -8.546   5.386  1.00  0.00      DND  C
ATOM    335  C9  GAD A  16      -6.642  -9.090   4.741  1.00  0.00      DND  C
ATOM    336  C10 GAD A  16      -5.486  -8.405   4.678  1.00  0.00      DND  C
ATOM    337  S11 GAD A  16      -5.007  -3.015   7.315  1.00  0.00      DND  S
ATOM    338  O12 GAD A  16      -3.860  -3.096   8.125  1.00  0.00      DND  O
ATOM    339  O13 GAD A  16      -6.212  -2.811   8.090  1.00  0.00      DND  O
ATOM    340  O14 GAD A  16      -4.902  -1.989   6.334  1.00  0.00      DND  O
ATOM    341  S15 GAD A  16      -9.293  -9.464   5.451  1.00  0.00      DND  S
ATOM    342  O16 GAD A  16      -9.048 -10.750   4.912  1.00  0.00      DND  O
ATOM    343  O17 GAD A  16      -9.759  -9.553   6.833  1.00  0.00      DND  O
ATOM    344  O18 GAD A  16     -10.197  -8.685   4.615  1.00  0.00      DND  O
ATOM    345  O19 GAD A  16      -3.196  -6.861   4.249  1.00  0.00      DND  O
ATOM    346  C20 GAD A  16      -2.019  -6.064   4.188  1.00  0.00      DND  C
ATOM    347  C21 GAD A  16      -1.017  -6.755   3.241  1.00  0.00      DND  C
ATOM    348  O22 GAD A  16      -1.389  -7.447   2.312  1.00  0.00      DND  O
ATOM    349  H1  GAD A  16      -3.185  -4.515   5.904  1.00  0.00      DND  H
ATOM    350  H2  GAD A  16      -7.243  -4.934   7.095  1.00  0.00      DND  H
ATOM    351  H3  GAD A  16      -8.619  -6.890   6.497  1.00  0.00      DND  H
ATOM    352  H4  GAD A  16      -6.759 -10.026   4.284  1.00  0.00      DND  H
ATOM    353  H5  GAD A  16      -4.633  -8.798   4.123  1.00  0.00      DND  H
ATOM    354  H6  GAD A  16      -2.350  -5.133   3.722  1.00  0.00      DND  H
ATOM    355  H7  GAD A  16      -1.536  -5.975   5.169  1.00  0.00      DND  H
ATOM    356  C1  GAD A  17      12.342 -12.612   0.159  1.00  0.00      DND  C
ATOM    357  C2  GAD A  17      11.095 -11.976  -0.223  1.00  0.00      DND  C
ATOM    358  C3  GAD A  17      10.211 -11.463   0.761  1.00  0.00      DND  C
ATOM    359  C4  GAD A  17      10.633 -11.565   2.152  1.00  0.00      DND  C
ATOM    360  C5  GAD A  17      11.915 -12.130   2.472  1.00  0.00      DND  C
ATOM    361  C6  GAD A  17      12.728 -12.686   1.493  1.00  0.00      DND  C
ATOM    362  C7  GAD A  17      13.200 -13.205  -0.753  1.00  0.00      DND  C
ATOM    363  C8  GAD A  17      12.931 -13.054  -2.096  1.00  0.00      DND  C
ATOM    364  C9  GAD A  17      11.801 -12.306  -2.497  1.00  0.00      DND  C
ATOM    365  C10 GAD A  17      10.935 -11.701  -1.559  1.00  0.00      DND  C
ATOM    366  S11 GAD A  17      12.620 -12.056   4.132  1.00  0.00      DND  S
ATOM    367  O12 GAD A  17      13.041 -13.350   4.419  1.00  0.00      DND  O
ATOM    368  O13 GAD A  17      11.538 -11.557   4.969  1.00  0.00      DND  O
ATOM    369  O14 GAD A  17      13.721 -11.131   4.055  1.00  0.00      DND  O
ATOM    370  S15 GAD A  17      14.108 -13.498  -3.380  1.00  0.00      DND  S
ATOM    371  O16 GAD A  17      13.283 -14.198  -4.385  1.00  0.00      DND  O
ATOM    372  O17 GAD A  17      14.777 -12.382  -3.915  1.00  0.00      DND  O
ATOM    373  O18 GAD A  17      15.029 -14.434  -2.741  1.00  0.00      DND  O
ATOM    374  O19 GAD A  17       9.038 -10.840   0.346  1.00  0.00      DND  O
ATOM    375  C20 GAD A  17       8.344 -10.123   1.328  1.00  0.00      DND  C
ATOM    376  C21 GAD A  17       7.045  -9.406   0.739  1.00  0.00      DND  C
ATOM    377  O22 GAD A  17       6.517  -9.793  -0.308  1.00  0.00      DND  O
ATOM    378  H1  GAD A  17      10.075 -11.245   3.029  1.00  0.00      DND  H
ATOM    379  H2  GAD A  17      13.656 -13.204   1.887  1.00  0.00      DND  H
ATOM    380  H3  GAD A  17      14.142 -13.664  -0.535  1.00  0.00      DND  H
ATOM    381  H4  GAD A  17      11.452 -12.238  -3.524  1.00  0.00      DND  H
ATOM    382  H5  GAD A  17      10.016 -11.264  -1.874  1.00  0.00      DND  H
ATOM    383  H6  GAD A  17       8.094 -10.703   2.153  1.00  0.00      DND  H
ATOM    384  H7  GAD A  17       8.931  -9.334   1.641  1.00  0.00      DND  H
ATOM    385  C1  GAD A  18      -4.490   1.448  11.525  1.00  0.00      DND  C
ATOM    386  C2  GAD A  18      -3.613   2.126  10.665  1.00  0.00      DND  C
ATOM    387  C3  GAD A  18      -3.838   2.347   9.247  1.00  0.00      DND  C
ATOM    388  C4  GAD A  18      -5.027   1.822   8.657  1.00  0.00      DND  C
ATOM    389  C5  GAD A  18      -5.944   1.155   9.550  1.00  0.00      DND  C
ATOM    390  C6  GAD A  18      -5.647   0.905  10.902  1.00  0.00      DND  C
ATOM    391  C7  GAD A  18      -4.249   1.191  12.913  1.00  0.00      DND  C
ATOM    392  C8  GAD A  18      -3.028   1.638  13.421  1.00  0.00      DND  C
ATOM    393  C9  GAD A  18      -2.232   2.554  12.671  1.00  0.00      DND  C
ATOM    394  C10 GAD A  18      -2.452   2.699  11.271  1.00  0.00      DND  C
ATOM    395  S11 GAD A  18      -7.496   0.671   8.911  1.00  0.00      DND  S
ATOM    396  O12 GAD A  18      -8.155  -0.304   9.742  1.00  0.00      DND  O
ATOM    397  O13 GAD A  18      -7.246   0.111   7.568  1.00  0.00      DND  O
ATOM    398  O14 GAD A  18      -8.109   1.966   8.822  1.00  0.00      DND  O
ATOM    399  S15 GAD A  18      -2.494   1.143  15.044  1.00  0.00      DND  S
ATOM    400  O16 GAD A  18      -1.151   1.647  15.275  1.00  0.00      DND  O
ATOM    401  O17 GAD A  18      -3.467   1.700  15.964  1.00  0.00      DND  O
ATOM    402  O18 GAD A  18      -2.508  -0.283  14.899  1.00  0.00      DND  O
ATOM    403  O19 GAD A  18      -2.962   3.071   8.449  1.00  0.00      DND  O
ATOM    404  C20 GAD A  18      -3.185   3.091   7.067  1.00  0.00      DND  C
ATOM    405  C21 GAD A  18      -1.920   3.767   6.394  1.00  0.00      DND  C
ATOM    406  O22 GAD A  18      -1.089   4.497   6.981  1.00  0.00      DND  O
ATOM    407  H1  GAD A  18      -5.317   2.040   7.662  1.00  0.00      DND  H
ATOM    408  H2  GAD A  18      -6.348   0.351  11.533  1.00  0.00      DND  H
ATOM    409  H3  GAD A  18      -4.952   0.555  13.476  1.00  0.00      DND  H
ATOM    410  H4  GAD A  18      -1.303   2.866  13.007  1.00  0.00      DND  H
ATOM    411  H5  GAD A  18      -1.716   3.283  10.851  1.00  0.00      DND  H
ATOM    412  H6  GAD A  18      -3.212   2.037   6.652  1.00  0.00      DND  H
ATOM    413  H7  GAD A  18      -4.022   3.653   6.727  1.00  0.00      DND  H
ATOM    414  C1  GAD A  19      -7.094  -5.481   2.504  1.00  0.00      DND  C
ATOM    415  C2  GAD A  19      -5.827  -5.017   1.986  1.00  0.00      DND  C
ATOM    416  C3  GAD A  19      -5.391  -3.723   2.281  1.00  0.00      DND  C
ATOM    417  C4  GAD A  19      -6.175  -2.869   3.130  1.00  0.00      DND  C
ATOM    418  C5  GAD A  19      -7.427  -3.370   3.623  1.00  0.00      DND  C
ATOM    419  C6  GAD A  19      -7.856  -4.742   3.353  1.00  0.00      DND  C
ATOM    420  C7  GAD A  19      -7.455  -6.831   2.272  1.00  0.00      DND  C
ATOM    421  C8  GAD A  19      -6.777  -7.640   1.398  1.00  0.00      DND  C
ATOM    422  C9  GAD A  19      -5.623  -7.209   0.866  1.00  0.00      DND  C
ATOM    423  C10 GAD A  19      -5.167  -5.922   1.131  1.00  0.00      DND  C
ATOM    424  S11 GAD A  19      -8.517  -2.287   4.529  1.00  0.00      DND  S
ATOM    425  O12 GAD A  19      -9.678  -3.082   4.798  1.00  0.00      DND  O
ATOM    426  O13 GAD A  19      -8.720  -1.241   3.522  1.00  0.00      DND  O
ATOM    427  O14 GAD A  19      -7.717  -1.984   5.669  1.00  0.00      DND  O
ATOM    428  S15 GAD A  19      -7.594  -9.138   1.009  1.00  0.00      DND  S
ATOM    429  O16 GAD A  19      -7.541  -9.246  -0.407  1.00  0.00      DND  O
ATOM    430  O17 GAD A  19      -6.904 -10.184   1.693  1.00  0.00      DND  O
ATOM    431  O18 GAD A  19      -8.975  -9.010   1.470  1.00  0.00      DND  O
ATOM    432  O19 GAD A  19      -4.215  -3.257   1.686  1.00  0.00      DND  O
ATOM    433  C20 GAD A  19      -3.624  -2.133   2.303  1.00  0.00      DND  C
ATOM    434  C21 GAD A  19      -2.218  -2.004   1.749  1.00  0.00      DND  C
ATOM    435  O22 GAD A  19      -1.691  -2.931   1.114  1.00  0.00      DND  O
ATOM    436  H1  GAD A  19      -5.929  -1.835   3.255  1.00  0.00      DND  H
ATOM    437  H2  GAD A  19      -8.795  -5.168   3.539  1.00  0.00      DND  H
ATOM    438  H3  GAD A  19      -8.212  -7.320   2.822  1.00  0.00      DND  H
ATOM    439  H4  GAD A  19      -5.137  -7.851   0.183  1.00  0.00      DND  H
ATOM    440  H5  GAD A  19      -4.204  -5.611   0.690  1.00  0.00      DND  H
ATOM    441  H6  GAD A  19      -4.157  -1.202   1.963  1.00  0.00      DND  H
ATOM    442  H7  GAD A  19      -3.693  -2.093   3.394  1.00  0.00      DND  H
ATOM    443  C1  GAD A  20      13.701  -9.095   0.302  1.00  0.00      DND  C
ATOM    444  C2  GAD A  20      13.043  -8.586  -0.823  1.00  0.00      DND  C
ATOM    445  C3  GAD A  20      11.780  -7.876  -0.616  1.00  0.00      DND  C
ATOM    446  C4  GAD A  20      11.268  -7.638   0.719  1.00  0.00      DND  C
ATOM    447  C5  GAD A  20      11.988  -8.116   1.796  1.00  0.00      DND  C
ATOM    448  C6  GAD A  20      13.255  -8.780   1.551  1.00  0.00      DND  C
ATOM    449  C7  GAD A  20      14.851  -9.931   0.122  1.00  0.00      DND  C
ATOM    450  C8  GAD A  20      15.367 -10.123  -1.175  1.00  0.00      DND  C
ATOM    451  C9  GAD A  20      14.731  -9.470  -2.265  1.00  0.00      DND  C
ATOM    452  C10 GAD A  20      13.486  -8.798  -2.120  1.00  0.00      DND  C
ATOM    453  S11 GAD A  20      11.365  -7.787   3.345  1.00  0.00      DND  S
ATOM    454  O12 GAD A  20      12.374  -8.191   4.291  1.00  0.00      DND  O
ATOM    455  O13 GAD A  20      10.213  -8.637   3.523  1.00  0.00      DND  O
ATOM    456  O14 GAD A  20      10.999  -6.381   3.317  1.00  0.00      DND  O
ATOM    457  S15 GAD A  20      16.938 -10.954  -1.450  1.00  0.00      DND  S
ATOM    458  O16 GAD A  20      17.994 -10.126  -0.893  1.00  0.00      DND  O
ATOM    459  O17 GAD A  20      16.781 -12.174  -0.737  1.00  0.00      DND  O
ATOM    460  O18 GAD A  20      17.066 -11.103  -2.906  1.00  0.00      DND  O
ATOM    461  O19 GAD A  20      11.040  -7.477  -1.720  1.00  0.00      DND  O
ATOM    462  C20 GAD A  20       9.683  -7.111  -1.594  1.00  0.00      DND  C
ATOM    463  C21 GAD A  20       8.977  -7.167  -2.980  1.00  0.00      DND  C
ATOM    464  O22 GAD A  20       9.456  -7.697  -3.966  1.00  0.00      DND  O
ATOM    465  H1  GAD A  20      10.359  -7.052   0.784  1.00  0.00      DND  H
ATOM    466  H2  GAD A  20      13.885  -9.019   2.398  1.00  0.00      DND  H
ATOM    467  H3  GAD A  20      15.325 -10.299   0.989  1.00  0.00      DND  H
ATOM    468  H4  GAD A  20      15.195  -9.607  -3.237  1.00  0.00      DND  H
ATOM    469  H5  GAD A  20      12.946  -8.455  -3.064  1.00  0.00      DND  H
ATOM    470  H6  GAD A  20       9.151  -7.818  -0.908  1.00  0.00      DND  H
ATOM    471  H7  GAD A  20       9.516  -6.119  -1.084  1.00  0.00      DND  H
ATOM    472  C1  GAD A  21      -0.306  -5.451 -12.652  1.00  0.00      DND  C
ATOM    473  C2  GAD A  21       0.155  -6.268 -11.602  1.00  0.00      DND  C
ATOM    474  C3  GAD A  21      -0.739  -6.690 -10.574  1.00  0.00      DND  C
ATOM    475  C4  GAD A  21      -2.106  -6.308 -10.648  1.00  0.00      DND  C
ATOM    476  C5  GAD A  21      -2.561  -5.527 -11.680  1.00  0.00      DND  C
ATOM    477  C6  GAD A  21      -1.686  -5.106 -12.696  1.00  0.00      DND  C
ATOM    478  C7  GAD A  21       0.605  -5.055 -13.692  1.00  0.00      DND  C
ATOM    479  C8  GAD A  21       1.943  -5.475 -13.641  1.00  0.00      DND  C
ATOM    480  C9  GAD A  21       2.419  -6.269 -12.633  1.00  0.00      DND  C
ATOM    481  C10 GAD A  21       1.499  -6.695 -11.617  1.00  0.00      DND  C
ATOM    482  S11 GAD A  21      -4.337  -5.322 -11.891  1.00  0.00      DND  S
ATOM    483  O12 GAD A  21      -4.636  -6.227 -12.931  1.00  0.00      DND  O
ATOM    484  O13 GAD A  21      -4.419  -3.931 -12.253  1.00  0.00      DND  O
ATOM    485  O14 GAD A  21      -5.017  -5.596 -10.676  1.00  0.00      DND  O
ATOM    486  S15 GAD A  21       3.039  -5.300 -15.052  1.00  0.00      DND  S
ATOM    487  O16 GAD A  21       4.243  -4.682 -14.517  1.00  0.00      DND  O
ATOM    488  O17 GAD A  21       3.277  -6.632 -15.556  1.00  0.00      DND  O
ATOM    489  O18 GAD A  21       2.327  -4.429 -15.964  1.00  0.00      DND  O
ATOM    490  O19 GAD A  21      -0.445  -7.457  -9.438  1.00  0.00      DND  O
ATOM    491  C20 GAD A  21       0.716  -7.051  -8.711  1.00  0.00      DND  C
ATOM    492  C21 GAD A  21       0.538  -6.961  -7.213  1.00  0.00      DND  C
ATOM    493  O22 GAD A  21      -0.583  -7.093  -6.701  1.00  0.00      DND  O
ATOM    494  H1  GAD A  21      -2.797  -6.779  -9.864  1.00  0.00      DND  H
ATOM    495  H2  GAD A  21      -2.075  -4.571 -13.548  1.00  0.00      DND  H
ATOM    496  H3  GAD A  21       0.249  -4.597 -14.597  1.00  0.00      DND  H
ATOM    497  H4  GAD A  21       3.380  -6.678 -12.728  1.00  0.00      DND  H
ATOM    498  H5  GAD A  21       1.947  -7.350 -10.910  1.00  0.00      DND  H
ATOM    499  H6  GAD A  21       1.427  -7.884  -8.900  1.00  0.00      DND  H
ATOM    500  H7  GAD A  21       1.127  -6.094  -9.075  1.00  0.00      DND  H
ATOM    501  C1  GAD A  22      11.702   3.292   2.128  1.00  0.00      DND  C
ATOM    502  C2  GAD A  22      11.309   2.487   1.055  1.00  0.00      DND  C
ATOM    503  C3  GAD A  22      11.062   1.075   1.212  1.00  0.00      DND  C
ATOM    504  C4  GAD A  22      11.257   0.557   2.507  1.00  0.00      DND  C
ATOM    505  C5  GAD A  22      11.701   1.376   3.583  1.00  0.00      DND  C
ATOM    506  C6  GAD A  22      11.984   2.708   3.375  1.00  0.00      DND  C
ATOM    507  C7  GAD A  22      11.910   4.686   1.936  1.00  0.00      DND  C
ATOM    508  C8  GAD A  22      11.862   5.229   0.616  1.00  0.00      DND  C
ATOM    509  C9  GAD A  22      11.510   4.396  -0.492  1.00  0.00      DND  C
ATOM    510  C10 GAD A  22      11.316   3.041  -0.235  1.00  0.00      DND  C
ATOM    511  S11 GAD A  22      12.049   0.670   5.133  1.00  0.00      DND  S
ATOM    512  O12 GAD A  22      13.453   0.462   5.180  1.00  0.00      DND  O
ATOM    513  O13 GAD A  22      11.282  -0.569   5.220  1.00  0.00      DND  O
ATOM    514  O14 GAD A  22      11.643   1.583   6.174  1.00  0.00      DND  O
ATOM    515  S15 GAD A  22      12.229   6.956   0.323  1.00  0.00      DND  S
ATOM    516  O16 GAD A  22      11.048   7.469  -0.253  1.00  0.00      DND  O
ATOM    517  O17 GAD A  22      12.564   7.507   1.614  1.00  0.00      DND  O
ATOM    518  O18 GAD A  22      13.346   6.932  -0.640  1.00  0.00      DND  O
ATOM    519  O19 GAD A  22      10.673   0.326   0.108  1.00  0.00      DND  O
ATOM    520  C20 GAD A  22      10.669  -1.102   0.352  1.00  0.00      DND  C
ATOM    521  C21 GAD A  22       9.830  -1.743  -0.851  1.00  0.00      DND  C
ATOM    522  O22 GAD A  22       8.918  -2.553  -0.660  1.00  0.00      DND  O
ATOM    523  H1  GAD A  22      11.231  -0.451   2.722  1.00  0.00      DND  H
ATOM    524  H2  GAD A  22      12.448   3.307   4.219  1.00  0.00      DND  H
ATOM    525  H3  GAD A  22      12.224   5.280   2.740  1.00  0.00      DND  H
ATOM    526  H4  GAD A  22      11.411   4.776  -1.433  1.00  0.00      DND  H
ATOM    527  H5  GAD A  22      11.264   2.322  -1.029  1.00  0.00      DND  H
ATOM    528  H6  GAD A  22      11.664  -1.476   0.399  1.00  0.00      DND  H
ATOM    529  H7  GAD A  22      10.170  -1.354   1.262  1.00  0.00      DND  H
ATOM    530  C1  GAD A  23       8.286   1.997   3.678  1.00  0.00      DND  C
ATOM    531  C2  GAD A  23       7.929   1.943   2.307  1.00  0.00      DND  C
ATOM    532  C3  GAD A  23       7.872   3.120   1.563  1.00  0.00      DND  C
ATOM    533  C4  GAD A  23       8.221   4.348   2.206  1.00  0.00      DND  C
ATOM    534  C5  GAD A  23       8.527   4.396   3.589  1.00  0.00      DND  C
ATOM    535  C6  GAD A  23       8.606   3.203   4.317  1.00  0.00      DND  C
ATOM    536  C7  GAD A  23       8.327   0.845   4.452  1.00  0.00      DND  C
ATOM    537  C8  GAD A  23       8.040  -0.366   3.866  1.00  0.00      DND  C
ATOM    538  C9  GAD A  23       7.729  -0.450   2.499  1.00  0.00      DND  C
ATOM    539  C10 GAD A  23       7.596   0.725   1.726  1.00  0.00      DND  C
ATOM    540  S11 GAD A  23       9.193   5.892   4.419  1.00  0.00      DND  S
ATOM    541  O12 GAD A  23      10.390   5.490   5.068  1.00  0.00      DND  O
ATOM    542  O13 GAD A  23       8.211   6.146   5.403  1.00  0.00      DND  O
ATOM    543  O14 GAD A  23       9.340   6.930   3.478  1.00  0.00      DND  O
ATOM    544  S15 GAD A  23       7.934  -1.767   4.896  1.00  0.00      DND  S
ATOM    545  O16 GAD A  23       6.808  -2.539   4.442  1.00  0.00      DND  O
ATOM    546  O17 GAD A  23       9.170  -2.447   4.709  1.00  0.00      DND  O
ATOM    547  O18 GAD A  23       7.722  -1.278   6.201  1.00  0.00      DND  O
ATOM    548  O19 GAD A  23       7.439   3.031   0.285  1.00  0.00      DND  O
ATOM    549  C20 GAD A  23       7.297   4.286  -0.414  1.00  0.00      DND  C
ATOM    550  C21 GAD A  23       6.627   4.070  -1.750  1.00  0.00      DND  C
ATOM    551  O22 GAD A  23       5.563   4.656  -1.963  1.00  0.00      DND  O
ATOM    552  H1  GAD A  23       8.289   5.297   1.680  1.00  0.00      DND  H
ATOM    553  H2  GAD A  23       9.034   3.233   5.329  1.00  0.00      DND  H
ATOM    554  H3  GAD A  23       8.436   0.997   5.504  1.00  0.00      DND  H
ATOM    555  H4  GAD A  23       7.480  -1.364   2.074  1.00  0.00      DND  H
ATOM    556  H5  GAD A  23       7.287   0.560   0.673  1.00  0.00      DND  H
ATOM    557  H6  GAD A  23       6.745   4.901   0.219  1.00  0.00      DND  H
ATOM    558  H7  GAD A  23       8.316   4.689  -0.606  1.00  0.00      DND  H
ATOM    559  C1  GAD A  24     -11.236  -2.082  -7.319  1.00  0.00      DND  C
ATOM    560  C2  GAD A  24     -12.283  -2.130  -6.411  1.00  0.00      DND  C
ATOM    561  C3  GAD A  24     -12.956  -3.337  -6.184  1.00  0.00      DND  C
ATOM    562  C4  GAD A  24     -12.523  -4.445  -6.956  1.00  0.00      DND  C
ATOM    563  C5  GAD A  24     -11.515  -4.374  -7.918  1.00  0.00      DND  C
ATOM    564  C6  GAD A  24     -10.855  -3.152  -8.080  1.00  0.00      DND  C
ATOM    565  C7  GAD A  24     -10.509  -0.875  -7.512  1.00  0.00      DND  C
ATOM    566  C8  GAD A  24     -10.902   0.322  -6.838  1.00  0.00      DND  C
ATOM    567  C9  GAD A  24     -11.932   0.209  -5.895  1.00  0.00      DND  C
ATOM    568  C10 GAD A  24     -12.659  -0.977  -5.719  1.00  0.00      DND  C
ATOM    569  S11 GAD A  24     -11.011  -5.761  -8.957  1.00  0.00      DND  S
ATOM    570  O12 GAD A  24     -11.797  -6.881  -8.574  1.00  0.00      DND  O
ATOM    571  O13 GAD A  24      -9.619  -5.907  -8.680  1.00  0.00      DND  O
ATOM    572  O14 GAD A  24     -11.232  -5.392 -10.305  1.00  0.00      DND  O
ATOM    573  S15 GAD A  24     -10.047   1.855  -7.058  1.00  0.00      DND  S
ATOM    574  O16 GAD A  24      -9.053   2.006  -6.012  1.00  0.00      DND  O
ATOM    575  O17 GAD A  24      -9.637   1.849  -8.412  1.00  0.00      DND  O
ATOM    576  O18 GAD A  24     -11.169   2.776  -6.856  1.00  0.00      DND  O
ATOM    577  O19 GAD A  24     -13.958  -3.434  -5.236  1.00  0.00      DND  O
ATOM    578  C20 GAD A  24     -14.833  -4.579  -5.253  1.00  0.00      DND  C
ATOM    579  C21 GAD A  24     -15.968  -4.326  -4.385  1.00  0.00      DND  C
ATOM    580  O22 GAD A  24     -16.371  -5.212  -3.621  1.00  0.00      DND  O
ATOM    581  H1  GAD A  24     -12.968  -5.377  -6.857  1.00  0.00      DND  H
ATOM    582  H2  GAD A  24     -10.039  -3.005  -8.766  1.00  0.00      DND  H
ATOM    583  H3  GAD A  24      -9.666  -0.795  -8.156  1.00  0.00      DND  H
ATOM    584  H4  GAD A  24     -12.306   1.104  -5.406  1.00  0.00      DND  H
ATOM    585  H5  GAD A  24     -13.484  -1.009  -5.022  1.00  0.00      DND  H
ATOM    586  H6  GAD A  24     -15.224  -4.686  -6.256  1.00  0.00      DND  H
ATOM    587  H7  GAD A  24     -14.233  -5.470  -4.886  1.00  0.00      DND  H
ATOM    588  C1  GAD A  25     -10.718  -5.408  -4.199  1.00  0.00      DND  C
ATOM    589  C2  GAD A  25     -11.022  -4.362  -3.299  1.00  0.00      DND  C
ATOM    590  C3  GAD A  25     -10.366  -3.108  -3.448  1.00  0.00      DND  C
ATOM    591  C4  GAD A  25      -9.249  -3.008  -4.407  1.00  0.00      DND  C
ATOM    592  C5  GAD A  25      -8.971  -4.042  -5.284  1.00  0.00      DND  C
ATOM    593  C6  GAD A  25      -9.734  -5.266  -5.271  1.00  0.00      DND  C
ATOM    594  C7  GAD A  25     -11.224  -6.691  -3.859  1.00  0.00      DND  C
ATOM    595  C8  GAD A  25     -12.073  -6.913  -2.819  1.00  0.00      DND  C
ATOM    596  C9  GAD A  25     -12.446  -5.849  -1.991  1.00  0.00      DND  C
ATOM    597  C10 GAD A  25     -11.974  -4.516  -2.260  1.00  0.00      DND  C
ATOM    598  S11 GAD A  25      -7.527  -3.952  -6.357  1.00  0.00      DND  S
ATOM    599  O12 GAD A  25      -6.443  -3.476  -5.520  1.00  0.00      DND  O
ATOM    600  O13 GAD A  25      -7.892  -2.958  -7.332  1.00  0.00      DND  O
ATOM    601  O14 GAD A  25      -7.275  -5.292  -6.913  1.00  0.00      DND  O
ATOM    602  S15 GAD A  25     -12.588  -8.582  -2.304  1.00  0.00      DND  S
ATOM    603  O16 GAD A  25     -12.767  -9.264  -3.539  1.00  0.00      DND  O
ATOM    604  O17 GAD A  25     -11.484  -9.112  -1.546  1.00  0.00      DND  O
ATOM    605  O18 GAD A  25     -13.748  -8.362  -1.532  1.00  0.00      DND  O
ATOM    606  O19 GAD A  25     -10.556  -2.126  -2.533  1.00  0.00      DND  O
ATOM    607  C20 GAD A  25     -10.231  -0.782  -2.748  1.00  0.00      DND  C
ATOM    608  C21 GAD A  25     -11.453   0.044  -2.375  1.00  0.00      DND  C
ATOM    609  O22 GAD A  25     -11.457   1.290  -2.505  1.00  0.00      DND  O
ATOM    610  H1  GAD A  25      -8.713  -2.042  -4.477  1.00  0.00      DND  H
ATOM    611  H2  GAD A  25      -9.511  -6.085  -6.029  1.00  0.00      DND  H
ATOM    612  H3  GAD A  25     -10.750  -7.421  -4.573  1.00  0.00      DND  H
ATOM    613  H4  GAD A  25     -13.161  -6.071  -1.152  1.00  0.00      DND  H
ATOM    614  H5  GAD A  25     -12.393  -3.695  -1.625  1.00  0.00      DND  H
ATOM    615  H6  GAD A  25      -9.390  -0.529  -2.071  1.00  0.00      DND  H
ATOM    616  H7  GAD A  25     -10.098  -0.638  -3.860  1.00  0.00      DND  H
ATOM    617  C1  GAD A  26       2.206  11.584  -1.046  1.00  0.00      DND  C
ATOM    618  C2  GAD A  26       1.830  10.901   0.170  1.00  0.00      DND  C
ATOM    619  C3  GAD A  26       0.544  11.050   0.690  1.00  0.00      DND  C
ATOM    620  C4  GAD A  26      -0.394  11.737  -0.022  1.00  0.00      DND  C
ATOM    621  C5  GAD A  26      -0.106  12.272  -1.325  1.00  0.00      DND  C
ATOM    622  C6  GAD A  26       1.211  12.116  -1.898  1.00  0.00      DND  C
ATOM    623  C7  GAD A  26       3.570  11.537  -1.398  1.00  0.00      DND  C
ATOM    624  C8  GAD A  26       4.544  10.899  -0.575  1.00  0.00      DND  C
ATOM    625  C9  GAD A  26       4.146  10.261   0.583  1.00  0.00      DND  C
ATOM    626  C10 GAD A  26       2.791  10.308   1.005  1.00  0.00      DND  C
ATOM    627  S11 GAD A  26      -1.296  13.320  -2.155  1.00  0.00      DND  S
ATOM    628  O12 GAD A  26      -2.387  12.405  -2.332  1.00  0.00      DND  O
ATOM    629  O13 GAD A  26      -0.670  13.805  -3.391  1.00  0.00      DND  O
ATOM    630  O14 GAD A  26      -1.497  14.434  -1.297  1.00  0.00      DND  O
ATOM    631  S15 GAD A  26       6.285  10.844  -1.188  1.00  0.00      DND  S
ATOM    632  O16 GAD A  26       6.165  10.121  -2.432  1.00  0.00      DND  O
ATOM    633  O17 GAD A  26       6.729  12.208  -1.256  1.00  0.00      DND  O
ATOM    634  O18 GAD A  26       7.023  10.047  -0.265  1.00  0.00      DND  O
ATOM    635  O19 GAD A  26       0.228  10.444   1.912  1.00  0.00      DND  O
ATOM    636  C20 GAD A  26      -1.126  10.372   2.413  1.00  0.00      DND  C
ATOM    637  C21 GAD A  26      -1.181   9.374   3.542  1.00  0.00      DND  C
ATOM    638  O22 GAD A  26      -0.156   8.792   3.988  1.00  0.00      DND  O
ATOM    639  H1  GAD A  26      -1.365  12.083   0.439  1.00  0.00      DND  H
ATOM    640  H2  GAD A  26       1.415  12.464  -2.884  1.00  0.00      DND  H
ATOM    641  H3  GAD A  26       3.886  12.134  -2.272  1.00  0.00      DND  H
ATOM    642  H4  GAD A  26       4.896   9.742   1.158  1.00  0.00      DND  H
ATOM    643  H5  GAD A  26       2.613   9.898   1.942  1.00  0.00      DND  H
ATOM    644  H6  GAD A  26      -1.429  11.350   2.698  1.00  0.00      DND  H
ATOM    645  H7  GAD A  26      -1.859  10.090   1.607  1.00  0.00      DND  H
ATOM    646  C1  GAD A  27     -14.182   1.857   7.017  1.00  0.00      DND  C
ATOM    647  C2  GAD A  27     -13.548   2.853   6.233  1.00  0.00      DND  C
ATOM    648  C3  GAD A  27     -12.171   2.744   5.857  1.00  0.00      DND  C
ATOM    649  C4  GAD A  27     -11.543   1.566   6.309  1.00  0.00      DND  C
ATOM    650  C5  GAD A  27     -12.139   0.573   7.035  1.00  0.00      DND  C
ATOM    651  C6  GAD A  27     -13.486   0.712   7.485  1.00  0.00      DND  C
ATOM    652  C7  GAD A  27     -15.571   1.934   7.350  1.00  0.00      DND  C
ATOM    653  C8  GAD A  27     -16.323   3.015   6.863  1.00  0.00      DND  C
ATOM    654  C9  GAD A  27     -15.719   4.031   6.167  1.00  0.00      DND  C
ATOM    655  C10 GAD A  27     -14.348   3.961   5.811  1.00  0.00      DND  C
ATOM    656  S11 GAD A  27     -11.255  -0.902   7.525  1.00  0.00      DND  S
ATOM    657  O12 GAD A  27      -9.934  -0.717   6.961  1.00  0.00      DND  O
ATOM    658  O13 GAD A  27     -11.870  -2.071   6.892  1.00  0.00      DND  O
ATOM    659  O14 GAD A  27     -11.255  -1.041   8.967  1.00  0.00      DND  O
ATOM    660  S15 GAD A  27     -17.964   3.317   7.455  1.00  0.00      DND  S
ATOM    661  O16 GAD A  27     -17.843   3.336   8.876  1.00  0.00      DND  O
ATOM    662  O17 GAD A  27     -18.548   4.526   6.914  1.00  0.00      DND  O
ATOM    663  O18 GAD A  27     -18.686   2.147   6.976  1.00  0.00      DND  O
ATOM    664  O19 GAD A  27     -11.611   3.739   5.043  1.00  0.00      DND  O
ATOM    665  C20 GAD A  27     -10.203   3.859   5.218  1.00  0.00      DND  C
ATOM    666  C21 GAD A  27      -9.588   5.069   4.662  1.00  0.00      DND  C
ATOM    667  O22 GAD A  27     -10.303   5.962   4.163  1.00  0.00      DND  O
ATOM    668  H1  GAD A  27     -10.453   1.398   6.053  1.00  0.00      DND  H
ATOM    669  H2  GAD A  27     -13.924  -0.145   8.033  1.00  0.00      DND  H
ATOM    670  H3  GAD A  27     -15.980   1.174   7.964  1.00  0.00      DND  H
ATOM    671  H4  GAD A  27     -16.187   4.946   5.889  1.00  0.00      DND  H
ATOM    672  H5  GAD A  27     -13.897   4.806   5.287  1.00  0.00      DND  H
ATOM    673  H6  GAD A  27     -10.114   3.746   6.325  1.00  0.00      DND  H
ATOM    674  H7  GAD A  27      -9.753   3.074   4.590  1.00  0.00      DND  H
ATOM    675  C1  GAD A  28      14.693  -5.103  -0.191  1.00  0.00      DND  C
ATOM    676  C2  GAD A  28      13.600  -5.019  -1.138  1.00  0.00      DND  C
ATOM    677  C3  GAD A  28      13.858  -5.250  -2.515  1.00  0.00      DND  C
ATOM    678  C4  GAD A  28      15.186  -5.623  -2.944  1.00  0.00      DND  C
ATOM    679  C5  GAD A  28      16.171  -5.855  -1.977  1.00  0.00      DND  C
ATOM    680  C6  GAD A  28      15.985  -5.591  -0.635  1.00  0.00      DND  C
ATOM    681  C7  GAD A  28      14.497  -4.826   1.143  1.00  0.00      DND  C
ATOM    682  C8  GAD A  28      13.280  -4.275   1.541  1.00  0.00      DND  C
ATOM    683  C9  GAD A  28      12.163  -4.267   0.670  1.00  0.00      DND  C
ATOM    684  C10 GAD A  28      12.288  -4.663  -0.665  1.00  0.00      DND  C
ATOM    685  S11 GAD A  28      17.730  -6.479  -2.453  1.00  0.00      DND  S
ATOM    686  O12 GAD A  28      18.118  -5.638  -3.563  1.00  0.00      DND  O
ATOM    687  O13 GAD A  28      17.616  -7.845  -2.892  1.00  0.00      DND  O
ATOM    688  O14 GAD A  28      18.686  -6.368  -1.378  1.00  0.00      DND  O
ATOM    689  S15 GAD A  28      13.066  -3.692   3.175  1.00  0.00      DND  S
ATOM    690  O16 GAD A  28      13.631  -4.630   4.101  1.00  0.00      DND  O
ATOM    691  O17 GAD A  28      13.771  -2.424   3.253  1.00  0.00      DND  O
ATOM    692  O18 GAD A  28      11.658  -3.428   3.424  1.00  0.00      DND  O
ATOM    693  O19 GAD A  28      12.934  -4.978  -3.457  1.00  0.00      DND  O
ATOM    694  C20 GAD A  28      12.615  -6.022  -4.415  1.00  0.00      DND  C
ATOM    695  C21 GAD A  28      11.895  -5.437  -5.604  1.00  0.00      DND  C
ATOM    696  O22 GAD A  28      12.413  -4.590  -6.332  1.00  0.00      DND  O
ATOM    697  H1  GAD A  28      15.384  -5.792  -4.030  1.00  0.00      DND  H
ATOM    698  H2  GAD A  28      16.740  -5.765   0.149  1.00  0.00      DND  H
ATOM    699  H3  GAD A  28      15.366  -4.933   1.841  1.00  0.00      DND  H
ATOM    700  H4  GAD A  28      11.225  -3.915   1.026  1.00  0.00      DND  H
ATOM    701  H5  GAD A  28      11.482  -4.591  -1.380  1.00  0.00      DND  H
ATOM    702  H6  GAD A  28      13.444  -6.651  -4.705  1.00  0.00      DND  H
ATOM    703  H7  GAD A  28      11.995  -6.635  -3.805  1.00  0.00      DND  H
ATOM    704  C1  GAD A  29      -1.055  -2.465 -10.640  1.00  0.00      DND  C
ATOM    705  C2  GAD A  29      -0.132  -3.043  -9.725  1.00  0.00      DND  C
ATOM    706  C3  GAD A  29       1.222  -3.208 -10.187  1.00  0.00      DND  C
ATOM    707  C4  GAD A  29       1.598  -2.782 -11.518  1.00  0.00      DND  C
ATOM    708  C5  GAD A  29       0.702  -2.097 -12.351  1.00  0.00      DND  C
ATOM    709  C6  GAD A  29      -0.653  -1.998 -11.934  1.00  0.00      DND  C
ATOM    710  C7  GAD A  29      -2.459  -2.370 -10.225  1.00  0.00      DND  C
ATOM    711  C8  GAD A  29      -2.880  -2.862  -8.949  1.00  0.00      DND  C
ATOM    712  C9  GAD A  29      -1.903  -3.359  -8.029  1.00  0.00      DND  C
ATOM    713  C10 GAD A  29      -0.547  -3.478  -8.427  1.00  0.00      DND  C
ATOM    714  S11 GAD A  29       1.200  -1.461 -13.925  1.00  0.00      DND  S
ATOM    715  O12 GAD A  29       0.208  -1.986 -14.814  1.00  0.00      DND  O
ATOM    716  O13 GAD A  29       2.504  -2.001 -14.206  1.00  0.00      DND  O
ATOM    717  O14 GAD A  29       1.069  -0.024 -13.809  1.00  0.00      DND  O
ATOM    718  S15 GAD A  29      -4.594  -2.759  -8.420  1.00  0.00      DND  S
ATOM    719  O16 GAD A  29      -4.815  -1.596  -7.640  1.00  0.00      DND  O
ATOM    720  O17 GAD A  29      -5.404  -2.646  -9.616  1.00  0.00      DND  O
ATOM    721  O18 GAD A  29      -4.805  -4.050  -7.812  1.00  0.00      DND  O
ATOM    722  O19 GAD A  29       2.224  -3.794  -9.361  1.00  0.00      DND  O
ATOM    723  C20 GAD A  29       3.477  -4.128  -9.918  1.00  0.00      DND  C
ATOM    724  C21 GAD A  29       4.221  -4.351  -8.588  1.00  0.00      DND  C
ATOM    725  O22 GAD A  29       4.163  -5.421  -8.036  1.00  0.00      DND  O
ATOM    726  H1  GAD A  29       2.577  -2.788 -11.918  1.00  0.00      DND  H
ATOM    727  H2  GAD A  29      -1.376  -1.648 -12.649  1.00  0.00      DND  H
ATOM    728  H3  GAD A  29      -3.165  -1.761 -10.800  1.00  0.00      DND  H
ATOM    729  H4  GAD A  29      -2.252  -3.694  -7.099  1.00  0.00      DND  H
ATOM    730  H5  GAD A  29       0.234  -3.866  -7.788  1.00  0.00      DND  H
ATOM    731  H6  GAD A  29       3.464  -5.101 -10.513  1.00  0.00      DND  H
ATOM    732  H7  GAD A  29       3.978  -3.326 -10.425  1.00  0.00      DND  H
ATOM    733  C1  GAD A  30      -1.334 -10.073  -5.734  1.00  0.00      DND  C
ATOM    734  C2  GAD A  30      -1.341  -9.803  -4.337  1.00  0.00      DND  C
ATOM    735  C3  GAD A  30      -0.407 -10.308  -3.365  1.00  0.00      DND  C
ATOM    736  C4  GAD A  30       0.676 -10.981  -3.955  1.00  0.00      DND  C
ATOM    737  C5  GAD A  30       0.844 -11.088  -5.343  1.00  0.00      DND  C
ATOM    738  C6  GAD A  30      -0.162 -10.658  -6.233  1.00  0.00      DND  C
ATOM    739  C7  GAD A  30      -2.299  -9.591  -6.593  1.00  0.00      DND  C
ATOM    740  C8  GAD A  30      -3.404  -8.816  -6.157  1.00  0.00      DND  C
ATOM    741  C9  GAD A  30      -3.515  -8.650  -4.810  1.00  0.00      DND  C
ATOM    742  C10 GAD A  30      -2.509  -9.094  -3.849  1.00  0.00      DND  C
ATOM    743  S11 GAD A  30       2.320 -11.922  -5.840  1.00  0.00      DND  S
ATOM    744  O12 GAD A  30       2.724 -11.476  -7.184  1.00  0.00      DND  O
ATOM    745  O13 GAD A  30       2.052 -13.310  -5.771  1.00  0.00      DND  O
ATOM    746  O14 GAD A  30       3.295 -11.601  -4.825  1.00  0.00      DND  O
ATOM    747  S15 GAD A  30      -4.741  -8.410  -7.255  1.00  0.00      DND  S
ATOM    748  O16 GAD A  30      -5.826  -9.269  -6.877  1.00  0.00      DND  O
ATOM    749  O17 GAD A  30      -5.145  -7.072  -6.914  1.00  0.00      DND  O
ATOM    750  O18 GAD A  30      -4.272  -8.570  -8.622  1.00  0.00      DND  O
ATOM    751  O19 GAD A  30      -0.626 -10.254  -1.969  1.00  0.00      DND  O
ATOM    752  C20 GAD A  30       0.342  -9.471  -1.163  1.00  0.00      DND  C
ATOM    753  C21 GAD A  30      -0.053  -7.981  -1.327  1.00  0.00      DND  C
ATOM    754  O22 GAD A  30       0.753  -7.185  -1.888  1.00  0.00      DND  O
ATOM    755  H1  GAD A  30       1.383 -11.385  -3.283  1.00  0.00      DND  H
ATOM    756  H2  GAD A  30      -0.136 -10.873  -7.321  1.00  0.00      DND  H
ATOM    757  H3  GAD A  30      -2.152  -9.860  -7.693  1.00  0.00      DND  H
ATOM    758  H4  GAD A  30      -4.335  -8.111  -4.472  1.00  0.00      DND  H
ATOM    759  H5  GAD A  30      -2.573  -9.013  -2.763  1.00  0.00      DND  H
ATOM    760  H6  GAD A  30       0.326  -9.804  -0.091  1.00  0.00      DND  H
ATOM    761  H7  GAD A  30       1.332  -9.700  -1.604  1.00  0.00      DND  H
ATOM    762  C1  GAD A  31      -8.749  -5.089  -0.656  1.00  0.00      DND  C
ATOM    763  C2  GAD A  31      -8.488  -3.709  -0.739  1.00  0.00      DND  C
ATOM    764  C3  GAD A  31      -7.507  -3.119  -1.604  1.00  0.00      DND  C
ATOM    765  C4  GAD A  31      -6.822  -3.988  -2.460  1.00  0.00      DND  C
ATOM    766  C5  GAD A  31      -7.012  -5.414  -2.317  1.00  0.00      DND  C
ATOM    767  C6  GAD A  31      -7.962  -5.929  -1.386  1.00  0.00      DND  C
ATOM    768  C7  GAD A  31      -9.773  -5.666   0.109  1.00  0.00      DND  C
ATOM    769  C8  GAD A  31     -10.516  -4.849   0.983  1.00  0.00      DND  C
ATOM    770  C9  GAD A  31     -10.294  -3.395   1.009  1.00  0.00      DND  C
ATOM    771  C10 GAD A  31      -9.284  -2.839   0.128  1.00  0.00      DND  C
ATOM    772  S11 GAD A  31      -6.132  -6.460  -3.430  1.00  0.00      DND  S
ATOM    773  O12 GAD A  31      -5.719  -7.552  -2.628  1.00  0.00      DND  O
ATOM    774  O13 GAD A  31      -5.051  -5.668  -3.900  1.00  0.00      DND  O
ATOM    775  O14 GAD A  31      -7.156  -6.801  -4.403  1.00  0.00      DND  O
ATOM    776  S15 GAD A  31     -11.742  -5.565   2.082  1.00  0.00      DND  S
ATOM    777  O16 GAD A  31     -12.146  -4.559   3.040  1.00  0.00      DND  O
ATOM    778  O17 GAD A  31     -12.857  -6.047   1.256  1.00  0.00      DND  O
ATOM    779  O18 GAD A  31     -11.033  -6.686   2.662  1.00  0.00      DND  O
ATOM    780  O19 GAD A  31      -7.475  -1.765  -1.678  1.00  0.00      DND  O
ATOM    781  C20 GAD A  31      -6.687  -1.206  -2.719  1.00  0.00      DND  C
ATOM    782  C21 GAD A  31      -5.251  -0.919  -2.212  1.00  0.00      DND  C
ATOM    783  O22 GAD A  31      -5.156  -0.026  -1.399  1.00  0.00      DND  O
ATOM    784  H1  GAD A  31      -6.194  -3.633  -3.208  1.00  0.00      DND  H
ATOM    785  H2  GAD A  31      -8.009  -6.945  -1.204  1.00  0.00      DND  H
ATOM    786  H3  GAD A  31      -9.831  -6.739   0.134  1.00  0.00      DND  H
ATOM    787  H4  GAD A  31     -10.902  -2.751   1.665  1.00  0.00      DND  H
ATOM    788  H5  GAD A  31      -9.087  -1.727   0.171  1.00  0.00      DND  H
ATOM    789  H6  GAD A  31      -6.678  -1.869  -3.593  1.00  0.00      DND  H
ATOM    790  H7  GAD A  31      -6.946  -0.213  -3.147  1.00  0.00      DND  H
END
